# Supplementary material for: Downstream STING pathways IRF3 and NF-κB differentially regulate CCL22 in response to cytosolic dsDNA
Source: Research Square preprint supplement (doi:10.21203/rs.3.rs-2264736/v1), 2022-11-30
Supplement: Supplementary file 1 [file c99a9243679386c9edcf0f04.xlsx]

## Sheet: qPCR
Fig. 1A-B
Sample	Target	Avg Ct		Sample	Target	Avg Ct		Sample	Target	Avg Ct		Sample	Target	Avg Ct		Sample	Target	Avg Ct		Sample	Target	Avg Ct		Sample	Target	Avg Ct		Sample	Target	Avg Ct		Sample	Target	Avg Ct		Sample	Target	Avg Ct		Sample	Target	Avg Ct
UN	GAPDH	16.9225		UN	GAPDH	16.7203		UN	GAPDH	15.7682		UN	GAPDH	16.9064		Mock	GAPDH	16.6479		UN	GAPDH	16.3476		UN	GAPDH	16.7376		UN	GAPDH	16.9821		UN	GAPDH	16.9495		UN	GAPDH	16.9359		UN	GAPDH	12.1873
Mock	GAPDH	16.8117		Mock	GAPDH	15.9475		Mock	GAPDH	15.3999		Mock	GAPDH	16.9512		dsDNA	GAPDH	17.863		Mock	GAPDH	15.3205		Mock	GAPDH	16.8307		Mock	GAPDH	16.5532		Mock	GAPDH	16.3314		Mock	GAPDH	16.781		Mock	GAPDH	12.1033
dsDNA	GAPDH	17.9323		dsDNA	GAPDH	17.1144		dsDNA	GAPDH	16.5586		dsDNA	GAPDH	17.9992		Mock	CCL22	35.1759		dsDNA	GAPDH	16.3403		dsDNA	GAPDH	17.8434		DA	GAPDH	16.5185		DA	GAPDH	16.4049		DA	GAPDH	16.6199		DA	GAPDH	12.074
UN	CCL22	34.1803		UN	CCL22	35.396		UN	CCL22	35.9506		UN	CCL22	34.734		dsDNA	CCL22	25.223		CpGf	GAPDH	16.3553		CpGf	GAPDH	17.5828		dsDNA	GAPDH	17.2689		dsDNA	GAPDH	17.2569		UN	CCL22	35.09		UN	CCL22	35.1981
Mock	CCL22	35.3972		Mock	CCL22	34.3953		Mock	CCL22	34.9434		Mock	CCL22	33.971						UN	CCL22	35.4838		UN	CCL22	36.145		CpGf	GAPDH	17.3586		CpGf	GAPDH	17.2388		Mock	CCL22	35.5505		Mock	CCL22	33.6282
dsDNA	CCL22	24.95		dsDNA	CCL22	23.6389		dsDNA	CCL22	25.9004		dsDNA	CCL22	24.7111						Mock	CCL22	35.4149		Mock	CCL22	37.4878		UN	CCL22	33.873		UN	CCL22	34.663		DA	CCL22	34.116		DA	CCL22	33.7155
																				dsDNA	CCL22	24.3635		dsDNA	CCL22	26.9555		Mock	CCL22	32.273		Mock	CCL22	33.01
																				CpGf	CCL22	24.8407		CpGf	CCL22	28.41		DA	CCL22	32.9841		DA	CCL22	32.9703
																												dsDNA	CCL22	22.2044		dsDNA	CCL22	22.3499
																												CpGf	CCL22	23.9222		CpGf	CCL22	24.3519
Fig. 1D
Sample	Target	Avg Ct		Sample	Target	Avg Ct		Sample	Target	Avg Ct		Sample	Target	Avg Ct
UN	GAPDH	17.2839		UN	GAPDH	16.1936		UN	GAPDH	15.742		UN	GAPDH	16.5231
Mock	GAPDH	15.6715		Mock	GAPDH	15.0256		Mock	GAPDH	14.8883		Mock	GAPDH	15.7118
EV	GAPDH	16.8001		EV	GAPDH	16.2082		EV	GAPDH	15.9777		EV	GAPDH	17.0453
UN	CCL22	31.742		UN	CCL22	30.6413		UN	CCL22	29.794		UN	CCL22	31.5688
Mock	CCL22	29.9718		Mock	CCL22	29.0066		Mock	CCL22	28.5175		Mock	CCL22	30.2646
EV	CCL22	24.8406		EV	CCL22	23.6511		EV	CCL22	23.0352		EV	CCL22	24.3423
Fig. 1E
Sample	Target	Avg Ct		Sample	Target	Avg Ct		Sample	Target	Avg Ct
UN	GAPDH	17.462		UN	GAPDH	16.2296		UN	GAPDH	16.6468
Mock	GAPDH	16.44		Mock	GAPDH	16.2518		Mock	GAPDH	16.036
EV	GAPDH	16.7584		EV	GAPDH	15.8927		EV	GAPDH	16.5968
UN	CCL22	35.154		UN	CCL22	35.4466		UN	CCL22	33.0009
Mock	CCL22	34.8516		Mock	CCL22	34.1953		Mock	CCL22	31.9166
EV	CCL22	33.6736		EV	CCL22	33.0226		EV	CCL22	31.6201
Fig. 1F
Sample	Target	Avg Ct		Sample	Target	Avg Ct		Sample	Target	Avg Ct
UN	ACTB	16.8417		UN	ACTB	16.7434		UN	GAPDH	17.462
Mock	ACTB	16.8506		Mock	ACTB	16.5799		Mock	GAPDH	16.44
EV	ACTB	16.6282		EV	ACTB	16.1865		EV	GAPDH	16.7584
UN	CCL22	31.2378		UN	CCL22	31.3933		UN	CCL22	35.154
Mock	CCL22	30.7113		Mock	CCL22	30.3805		Mock	CCL22	34.8516
EV	CCL22	30.4138		EV	CCL22	30.3272		EV	CCL22	33.6736
Fig. 2B
Sample	Target	Avg Ct		Sample	Target	Avg Ct		Sample	Target	Avg Ct		Sample	Target	Avg Ct
UN	GAPDH	17.292		UN	GAPDH	18.2276		UN	GAPDH	16.524		UN	GAPDH	16.2884
Mock	GAPDH	17.422		Mock	GAPDH	18.4833		Mock	GAPDH	16.486		Mock	GAPDH	16.1884
2.5 uM cGAMP	GAPDH	17.549		2.5 uM cGAMP	GAPDH	18.4259		2.5 uM cGAMP	GAPDH	16.56		10.0 uM cGAMP	GAPDH	16.1929
5.0 uM cGAMP	GAPDH	17.521		5.0 uM cGAMP	GAPDH	18.2301		5.0 uM cGAMP	GAPDH	16.465		UN	CCL22	36.7041
UN	CCL22	35.2043		10.0 uM cGAMP	GAPDH	18.2698		10.0 uM cGAMP	GAPDH	16.585		Mock	CCL22	36.0534
Mock	CCL22	35.5173		UN	CCL22	34.7762		UN	CCL22	35.5099		10.0 uM cGAMP	CCL22	30.9941
2.5 uM cGAMP	CCL22	30.5269		Mock	CCL22	35.1356		Mock	CCL22	36.9487
5.0 uM cGAMP	CCL22	30.3891		2.5 uM cGAMP	CCL22	31.0433		2.5 uM cGAMP	CCL22	31.2299
				5.0 uM cGAMP	CCL22	30.6595		5.0 uM cGAMP	CCL22	30.5314
				10.0 uM cGAMP	CCL22	30.413		10.0 uM cGAMP	CCL22	30.2211
Fig. 2C
Sample	Target	Avg Ct		Sample	Target	Avg Ct		Sample	Target	Avg Ct
UN	GAPDH	16.6978		UN	GAPDH	16.6255		UN	GAPDH	16.5756
Mock	GAPDH	16.255		Mock	GAPDH	16.2152		Mock	GAPDH	16.005
10.0 uM cGAMP	GAPDH	16.4251		10.0 uM cGAMP	GAPDH	16.4012		10.0 uM cGAMP	GAPDH	16.3465
UN	CCL22	28.8302		UN	CCL22	28.6566		UN	CCL22	28.2891
Mock	CCL22	28.003		Mock	CCL22	27.8237		Mock	CCL22	27.8016
10.0 uM cGAMP	CCL22	22.6219		10.0 uM cGAMP	CCL22	21.9804		10.0 uM cGAMP	CCL22	22.1845
Fig. 2H WT
Sample	Target	Avg Ct		Sample	Target	Avg Ct		Sample	Target	Avg Ct
WT UN	ACTB	16.6883		WT UN	ACTB	17.2399		WT UN	ACTB	16.6656
WT Mock	ACTB	16.7538		WT Mock	ACTB	16.8693		WT Mock	ACTB	17.0412
WT EV	ACTB	17.0333		WT EV	ACTB	17.3823		WT EV	ACTB	16.5567
WT UN	CCL22	34.2291		WT UN	CCL22	34.2378		WT UN	CCL22	33.0881
WT Mock	CCL22	32.9947		WT Mock	CCL22	32.5743		WT Mock	CCL22	33.4658
WT EV	CCL22	23.3512		WT EV	CCL22	23.2005		WT EV	CCL22	22.4154
Fig. 2H KO-1
Sample	Target	Avg Ct		Sample	Target	Avg Ct		Sample	Target	Avg Ct
KO1 UN	ACTB	17.8249		KO1 UN	ACTB	17.8135		KO1 UN	ACTB	17.9611
KO1 Mock	ACTB	17.6153		KO1 Mock	ACTB	17.5866		KO1 Mock	ACTB	18.1624
KO1 EV	ACTB	16.7368		KO1 EV	ACTB	16.7204		KO1 EV	ACTB	17.3315
KO1 UN	CCL22	34.3929		KO1 UN	CCL22	34.8524		KO1 UN	CCL22	33.156
KO1 Mock	CCL22	33.3978		KO1 Mock	CCL22	34.0483		KO1 Mock	CCL22	33.5541
KO1 EV	CCL22	33.9934		KO1 EV	CCL22	33.5904		KO1 EV	CCL22	33.3906
Fig. 2H KO-2
Sample	Target	Avg Ct		Sample	Target	Avg Ct		Sample	Target	Avg Ct
KO2 UN	ACTB	17.0682		KO2 UN	ACTB	16.6839		KO2 UN	ACTB	17.2563
KO2 Mock	ACTB	17.1282		KO2 Mock	ACTB	16.8725		KO2 Mock	ACTB	16.9759
KO2 EV	ACTB	16.9641		KO2 EV	ACTB	16.789		KO2 EV	ACTB	16.9484
KO2 UN	CCL22	31.8217		KO2 UN	CCL22	34.836		KO2 UN	CCL22	33.2855
KO2 Mock	CCL22	32.8255		KO2 Mock	CCL22	34.3954		KO2 Mock	CCL22	32.7644
KO2 EV	CCL22	32.54		KO2 EV	CCL22	32.5037		KO2 EV	CCL22	34.1765
Fig. 3A
Sample	Target	Avg Ct		Sample	Target	Avg Ct		Sample	Target	Avg Ct
Mock	ACTB	17.4046		Mock	ACTB	17.0122		Mock	ACTB	16.7207
dsDNA, no MRT67307	ACTB	17.0118		dsDNA, no MRT67307	ACTB	16.6362		dsDNA, no MRT67307	ACTB	16.6067
dsDNA, MRT67307 0.27 uM	ACTB	16.6651		dsDNA, MRT67307 0.27 uM	ACTB	16.087		dsDNA, MRT67307 0.27 uM	ACTB	16.2615
dsDNA, MRT67307 0.54 uM	ACTB	16.5737		dsDNA, MRT67307 0.54 uM	ACTB	16.1284		dsDNA, MRT67307 0.54 uM	ACTB	16.2775
Mock	18S	9.45729		Mock	18S	8.98573		Mock	18S	7.93125
dsDNA, no MRT67307	18S	9.1822		dsDNA, no MRT67307	18S	8.90541		dsDNA, no MRT67307	18S	7.82045
dsDNA, MRT67307 0.27 uM	18S	9.66823		dsDNA, MRT67307 0.27 uM	18S	8.9819		dsDNA, MRT67307 0.27 uM	18S	7.4574
dsDNA, MRT67307 0.54 uM	18S	9.66909		dsDNA, MRT67307 0.54 uM	18S	9.42536		dsDNA, MRT67307 0.54 uM	18S	7.56283
Mock	CCL22	37.0304		Mock	CCL22	36.8263		Mock	CCL22	35.182
dsDNA, no MRT67307	CCL22	26.8437		dsDNA, no MRT67307	CCL22	26.1957		dsDNA, no MRT67307	CCL22	25.0553
dsDNA, MRT67307 0.27 uM	CCL22	30.9314		dsDNA, MRT67307 0.27 uM	CCL22	29.8217		dsDNA, MRT67307 0.27 uM	CCL22	26.8539
dsDNA, MRT67307 0.54 uM	CCL22	33.7938		dsDNA, MRT67307 0.54 uM	CCL22	33.1444		dsDNA, MRT67307 0.54 uM	CCL22	30.1266
Fig. 3B
Sample	Target	Avg Ct		Sample	Target	Avg Ct		Sample	Target	Avg Ct
Mock	GAPDH	15.9483		Mock	GAPDH	15.6108		Mock	GAPDH	15.6265
dsDNA, no MRT67307	GAPDH	16.9832		dsDNA, no MRT67307	GAPDH	16.6634		dsDNA, no MRT67307	GAPDH	17.078
dsDNA, MRT67307 0.31 uM	GAPDH	16.8756		dsDNA, MRT67307 0.31 uM	GAPDH	16.4274		dsDNA, MRT67307 0.31 uM	GAPDH	16.7862
dsDNA, MRT67307 0.63 uM	GAPDH	17.0584		dsDNA, MRT67307 0.63 uM	GAPDH	16.2688		dsDNA, MRT67307 0.63 uM	GAPDH	16.9431
Mock	CCL22	27.2901		Mock	CCL22	27.0011		Mock	CCL22	27.6985
dsDNA, no MRT67307	CCL22	21.8426		dsDNA, no MRT67307	CCL22	21.2665		dsDNA, no MRT67307	CCL22	21.7569
dsDNA, MRT67307 0.31 uM	CCL22	22.4576		dsDNA, MRT67307 0.31 uM	CCL22	21.8676		dsDNA, MRT67307 0.31 uM	CCL22	22.4965
dsDNA, MRT67307 0.63 uM	CCL22	23.9485		dsDNA, MRT67307 0.63 uM	CCL22	22.3427		dsDNA, MRT67307 0.63 uM	CCL22	23.2765
Fig. 3E
Sample	Target	Avg Ct		Sample	Target	Avg Ct		Sample	Target	Avg Ct
UN	GAPDH	16.025		UN	GAPDH	16.2248		UN	GAPDH	15.8936
MRT	GAPDH	16.1813		MRT	GAPDH	16.0023		MRT	GAPDH	16.0271
cGAMP	GAPDH	16.2944		cGAMP	GAPDH	16.1677		cGAMP	GAPDH	16.3305
MRT/cGAMP	GAPDH	16.2136		MRT/cGAMP	GAPDH	16.2261		MRT/cGAMP	GAPDH	16.1254
UN	CCL22	33.66		UN	CCL22	33.6606		UN	CCL22	32.3515
MRT	CCL22	34.8305		MRT	CCL22	34.8492		MRT	CCL22	36.069
cGAMP	CCL22	28.0561		cGAMP	CCL22	28.187		cGAMP	CCL22	27.7092
MRT/cGAMP	CCL22	33.5721		MRT/cGAMP	CCL22	34.5295		MRT/cGAMP	CCL22	35.222
Fig. 3F
Sample	Target	Avg Ct		Sample	Target	Avg Ct		Sample	Target	Avg Ct
UN (-MRT/-cGAMP)	GAPDH	16.3239		UN (-MRT/-cGAMP)	GAPDH	15.8343		UN (-MRT/-cGAMP)	GAPDH	15.611
MRT (+/-)	GAPDH	16.1205		MRT (+/-)	GAPDH	15.8547		MRT (+/-)	GAPDH	15.5616
cGAMP (-/+)	GAPDH	15.9745		cGAMP (-/+)	GAPDH	16.1353		cGAMP (-/+)	GAPDH	15.6947
MRT/cGAMP (+/+)	GAPDH	16.095		MRT/cGAMP (+/+)	GAPDH	15.792		MRT/cGAMP (+/+)	GAPDH	15.5781
UN (-MRT/-cGAMP)	CCL22	28.5903		UN (-MRT/-cGAMP)	CCL22	27.996		UN (-MRT/-cGAMP)	CCL22	27.7256
MRT (+/-)	CCL22	28.785		MRT (+/-)	CCL22	28.8177		MRT (+/-)	CCL22	28.4789
cGAMP (-/+)	CCL22	22.2178		cGAMP (-/+)	CCL22	20.5604		cGAMP (-/+)	CCL22	20.6234
MRT/cGAMP (+/+)	CCL22	26.3694		MRT/cGAMP (+/+)	CCL22	25.9929		MRT/cGAMP (+/+)	CCL22	25.5378
Fig. 4A
Sample	Target	Avg Ct		Sample	Target	Avg Ct		Sample	Target	Avg Ct
UN	GAPDH	16.1377		UN	GAPDH	16.9281		UN	GAPDH	17.6309
TNFa 8 ng/mL	GAPDH	16.3145		TNFa 8 ng/mL	GAPDH	17.315		TNFa 8 ng/mL	GAPDH	17.811
UN	CCL22	35.761		UN	CCL22	34.6563		UN	CCL22	34.732
TNFa 8 ng/mL	CCL22	32.732		TNFa 8 ng/mL	CCL22	30.3598		TNFa 8 ng/mL	CCL22	30.5032
Fig. 4B
Sample	Target	Avg Ct		Sample	Target	Avg Ct		Sample	Target	Avg Ct
UN	GAPDH	16.1666		UN	GAPDH	16.0939		UN	GAPDH	17.2174
DMSO	GAPDH	16.2195		DMSO	GAPDH	16.0454		DMSO	GAPDH	16.842
PMA 10 ng/mL	GAPDH	16.4316		PMA 10 ng/mL	GAPDH	16.5165		PMA 10 ng/mL	GAPDH	16.395
UN	CCL22	35.3514		UN	CCL22	34.722		UN	CCL22	32.8164
DMSO	CCL22	35.8946		DMSO	CCL22	34.4322		DMSO	CCL22	33.521
PMA 10 ng/mL	CCL22	28.0684		PMA 10 ng/mL	CCL22	28.5336		PMA 10 ng/mL	CCL22	26.2778
Fig. 4C
Sample	Target	Avg Ct		Sample	Target	Avg Ct		Sample	Target	Avg Ct
No shRNA (NS)	GAPDH	16.1129		No shRNA	GAPDH	15.9362		No shRNA	GAPDH	15.1848
NT shRNA	GAPDH	16.1375		NT shRNA	GAPDH	16.1068		NT shRNA	GAPDH	15.5638
p65-1 shRNA	GAPDH	15.884		p65-1 shRNA	GAPDH	16.1765		p65-1 shRNA	GAPDH	15.7187
p65-2 shRNA	GAPDH	16.8905		p65-2 shRNA	GAPDH	16.752		p65-2 shRNA	GAPDH	15.8227
No shRNA (NS)	RELA/p65	23.9188		No shRNA	RELA/p65	23.7168		No shRNA	RELA/p65	22.8584
NT shRNA	RELA/p65	23.2676		NT shRNA	RELA/p65	23.7857		NT shRNA	RELA/p65	22.9669
p65-1 shRNA	RELA/p65	26.0538		p65-1 shRNA	RELA/p65	25.979		p65-1 shRNA	RELA/p65	25.2142
p65-2 shRNA	RELA/p65	26.3329		p65-2 shRNA	RELA/p65	25.3136		p65-2 shRNA	RELA/p65	24.0007
Fig. 4E
Non-targeting shRNA (NT)
Sample	Target	Avg Ct		Sample	Target	Avg Ct		Sample	Target	Avg Ct		Sample	Target	Avg Ct		Sample	Target	Avg Ct		Sample	Target	Avg Ct		Sample	Target	Avg Ct
NT - DNA	GAPDH	17.0211		NT - DNA	GAPDH	16.8434		NT - DNA	GAPDH	17.1539		NT - DNA	GAPDH	16.5156		NT - DNA	GAPDH	16.6217		NT - DNA	GAPDH	16.7436		NT - DNA	GAPDH	15.8434
NT + dsDNA	GAPDH	17.9838		NT + dsDNA	GAPDH	17.4677		NT + dsDNA	GAPDH	17.9617		NT + dsDNA	GAPDH	17.2857		NT + dsDNA	GAPDH	17.561		NT + dsDNA	GAPDH	18.027		NT + dsDNA	GAPDH	17.0009
NT - DNA	CCL22	33.6288		NT - DNA	CCL22	33.5256		NT - DNA	CCL22	36.0127		NT - DNA	CCL22	34.46		NT - DNA	CCL22	34.8792		NT - DNA	CCL22	35.2261		NT - DNA	CCL22	35.1235
NT + dsDNA	CCL22	25.0123		NT + dsDNA	CCL22	24.0274		NT + dsDNA	CCL22	26.8218		NT + dsDNA	CCL22	23.3867		NT + dsDNA	CCL22	24.2666		NT + dsDNA	CCL22	26.1713		NT + dsDNA	CCL22	25.9453
shRNA p65-1
Sample	Target	Avg Ct		Sample	Target	Avg Ct		Sample	Target	Avg Ct		Sample	Target	Avg Ct		Sample	Target	Avg Ct
p65-1 shRNA - DNA	GAPDH	16.8094		p65-1 shRNA - DNA	GAPDH	16.4119		p65-1 shRNA - DNA	GAPDH	16.7609		p65-1 shRNA - DNA	GAPDH	15.8617		p65-1 shRNA - DNA	GAPDH	15.54
p65-1 shRNA + DNA	GAPDH	17.4636		p65-1 shRNA + DNA	GAPDH	17.3079		p65-1 shRNA + DNA	GAPDH	17.7678		p65-1 shRNA + DNA	GAPDH	16.5676		p65-1 shRNA + DNA	GAPDH	16.5027
p65-1 shRNA - DNA	CCL22	34.607		p65-1 shRNA - DNA	CCL22	34.9049		p65-1 shRNA - DNA	CCL22	36.5833		p65-1 shRNA - DNA	CCL22	36.3538		p65-1 shRNA - DNA	CCL22	35.7329
p65-1 shRNA + DNA	CCL22	25.8145		p65-1 shRNA + DNA	CCL22	26.82		p65-1 shRNA + DNA	CCL22	28.5011		p65-1 shRNA + DNA	CCL22	28.649		p65-1 shRNA + DNA	CCL22	27.5934
shRNA p65-2
Sample	Target	Avg Ct		Sample	Target	Avg Ct		Sample	Target	Avg Ct		Sample	Target	Avg Ct
p65-2 shRNA - DNA	GAPDH	17.6391		p65-2 shRNA - DNA	GAPDH	16.8134		p65-2 shRNA - DNA	GAPDH	16.2907		p65-2 shRNA - DNA	GAPDH	16.0801
p65-2 shRNA + DNA	GAPDH	18.0573		p65-2 shRNA + DNA	GAPDH	17.7609		p65-2 shRNA + DNA	GAPDH	17.2164		p65-2 shRNA + DNA	GAPDH	17.0698
p65-2 shRNA - DNA	CCL22	33.9348		p65-2 shRNA - DNA	CCL22	34.254		p65-2 shRNA - DNA	CCL22	36.0096		p65-2 shRNA - DNA	CCL22	35.4221
p65-2 shRNA + DNA	CCL22	26.0128		p65-2 shRNA + DNA	CCL22	25.2691		p65-2 shRNA + DNA	CCL22	27.408		p65-2 shRNA + DNA	CCL22	27.9928
Fig. 5A
Sample	Target	Avg Ct		Sample	Target	Avg Ct		Sample	Target	Avg Ct
No shRNA (NS)	GAPDH	18.227		No shRNA (NS)	GAPDH	15.9286		No shRNA (NS)	GAPDH	15.2785
NT shRNA	GAPDH	17.2222		NT shRNA	GAPDH	15.7467		NT shRNA	GAPDH	15.5308
IRF3-1 shRNA	GAPDH	17.23		IRF3-1 shRNA	GAPDH	16.0908		IRF3-1 shRNA	GAPDH	15.6072
IRF3-2 shRNA	GAPDH	16.952		IRF3-2 shRNA	GAPDH	15.9374		IRF3-2 shRNA	GAPDH	15.6062
No shRNA (NS)	IRF3	23.8856		No shRNA (NS)	IRF3	22.6932		No shRNA (NS)	IRF3	22.1899
NT shRNA	IRF3	23.2788		NT shRNA	IRF3	22.1844		NT shRNA	IRF3	22.1832
IRF3-1 shRNA	IRF3	24.3797		IRF3-1 shRNA	IRF3	23.6323		IRF3-1 shRNA	IRF3	23.0935
IRF3-2 shRNA	IRF3	24.5008		IRF3-2 shRNA	IRF3	23.8998		IRF3-2 shRNA	IRF3	23.5785
Fig. 5C
shRNA IRF3-1
Sample	Target	Avg Ct		Sample	Target	Avg Ct		Sample	Target	Avg Ct
IRF3-1 shRNA - DNA	GAPDH	16.1995		IRF3-1 shRNA - DNA	GAPDH	17.1627		IRF3-1 shRNA - DNA	GAPDH	17.1922
IRF3-1 shRNA + DNA	GAPDH	16.33		IRF3-1 shRNA + DNA	GAPDH	18.4094		IRF3-1 shRNA + DNA	GAPDH	18.1194
IRF3-1 shRNA - DNA	CCL22	34.4849		IRF3-1 shRNA - DNA	CCL22	33.1872		IRF3-1 shRNA - DNA	CCL22	35.3161
IRF3-1 shRNA + DNA	CCL22	32.7056		IRF3-1 shRNA + DNA	CCL22	30.0602		IRF3-1 shRNA + DNA	CCL22	31.7435
shRNA IRF3-2
Sample	Target	Avg Ct		Sample	Target	Avg Ct		Sample	Target	Avg Ct
IRF3-2 shRNA - DNA	GAPDH	16.7323		IRF3-2 shRNA - DNA	GAPDH	15.8766		IRF3-2 shRNA - DNA	GAPDH	16.9781
IRF3-2 shRNA + DNA	GAPDH	17.3679		IRF3-2 shRNA + DNA	GAPDH	16.6871		IRF3-2 shRNA + DNA	GAPDH	17.5872
IRF3-2 shRNA - DNA	CCL22	34.1475		IRF3-2 shRNA - DNA	CCL22	35.6707		IRF3-2 shRNA - DNA	CCL22	37.2823
IRF3-2 shRNA + DNA	CCL22	29.6153		IRF3-2 shRNA + DNA	CCL22	31.0233		IRF3-2 shRNA + DNA	CCL22	33.7326
Fig. 5E
Sample	Target	Avg Ct		Sample	Target	Avg Ct		Sample	Target	Avg Ct
Mock	ACTB	18.8502		Mock	ACTB	17.2293		Mock	ACTB	16.7207
Neo-EV	ACTB	18.1063		Neo-EV	ACTB	16.4002		Neo-EV	ACTB	16.2168
Neo-IRF3-5D	ACTB	18.645		Neo-IRF3-5D	ACTB	17.3047		Neo-IRF3-5D	ACTB	17.6359
Mock	18S	9.64032		Mock	18S	8.36405		Mock	18S	7.93125
Neo-EV	18S	9.77229		Neo-EV	18S	8.7794		Neo-EV	18S	7.81342
Neo-IRF3-5D	18S	9.61989		Neo-IRF3-5D	18S	8.52926		Neo-IRF3-5D	18S	8.09076
Mock	CCL22	38.2637		Mock	CCL22	37.0295		Mock	CCL22	35.182
Neo-EV	CCL22	28.8287		Neo-EV	CCL22	26.8107		Neo-EV	CCL22	25.1985
Neo-IRF3-5D	CCL22	25.6292		Neo-IRF3-5D	CCL22	24.0734		Neo-IRF3-5D	CCL22	23.4466
Fig. 5F
Sample	Target	Avg Ct		Sample	Target	Avg Ct		Sample	Target	Avg Ct
Mock	GAPDH	15.9751		Mock	GAPDH	15.6108		Mock	GAPDH	15.6265
Neo-EV	GAPDH	17.0738		Neo-EV	GAPDH	16.3444		Neo-EV	GAPDH	17.2299
Neo-IRF3-5D	GAPDH	17.0612		Neo-IRF3-5D	GAPDH	16.3931		Neo-IRF3-5D	GAPDH	17.174
Mock	CCL22	27.8015		Mock	CCL22	27.0011		Mock	CCL22	27.6985
Neo-EV	CCL22	21.4284		Neo-EV	CCL22	20.8109		Neo-EV	CCL22	21.5967
Neo-IRF3-5D	CCL22	20.4149		Neo-IRF3-5D	CCL22	20.0102		Neo-IRF3-5D	CCL22	20.8513
Fig. 6A
Sample	Target	Avg Ct		Sample	Target	Avg Ct		Sample	Target	Avg Ct
UN	GAPDH	16.9981		UN	GAPDH	17.6226		UN	GAPDH	17.5671
Mock	GAPDH	16.9377		Mock	GAPDH	17.4242		Mock	GAPDH	17.3602
dsDNA	GAPDH	16.9567		dsDNA	GAPDH	17.4771		dsDNA	GAPDH	17.3196
UN	CCL22	35.0064		UN	CCL22	34.4825		UN	CCL22	34.4031
Mock	CCL22	34.2442		Mock	CCL22	34.6749		Mock	CCL22	34.6749
dsDNA	CCL22	32.8339		dsDNA	CCL22	34.7357		dsDNA	CCL22	34.1771
Fig. 6F
Sample	Target	Avg Ct		Sample	Target	Avg Ct		Sample	Target	Avg Ct
dsDNA -	GAPDH	15.5509		dsDNA -	GAPDH	15.1998		dsDNA -	GAPDH	15.1746
dsDNA	GAPDH	16.4401		dsDNA	GAPDH	16.303		dsDNA	GAPDH	15.3692
dsDNA -	IFNb	31.1205		dsDNA -	ACTB	15.6885		dsDNA -	ACTB	15.9833
dsDNA	IFNb	21.8031		dsDNA	ACTB	15.9186		dsDNA	ACTB	15.6894
				dsDNA -	IFNb	30.7631		dsDNA -	IFNb	32.4518
				dsDNA	IFNb	21.1559		dsDNA	IFNb	22.712
Fig. 6G
ATCC HeLa
Sample	Target	Avg Ct		Sample	Target	Avg Ct		Sample	Target	Avg Ct
dsDNA -	GAPDH	16.9795		dsDNA -	GAPDH	16.4286		dsDNA -	GAPDH	16.6712
dsDNA	GAPDH	16.9591		dsDNA	GAPDH	16.2391		dsDNA	GAPDH	16.4918
dsDNA -	IFNb	33.4626		dsDNA -	ACTB	15.4358		dsDNA -	ACTB	15.2511
dsDNA	IFNb	32.9348		dsDNA	ACTB	15.4259		dsDNA	ACTB	14.9804
				dsDNA -	IFNb	32.2835		dsDNA -	IFNb	32.666
Fig. 6G
HeLa
Sample	Target	Avg Ct		Sample	Target	Avg Ct		Sample	Target	Avg Ct
dsDNA -	GAPDH	17.0786		dsDNA -	GAPDH	16.7842		dsDNA -	GAPDH	16.6213
dsDNA	GAPDH	17.6512		dsDNA	GAPDH	17.8434		dsDNA	GAPDH	18.0875
dsDNA -	IFNb	33.7053		dsDNA -	IFNb	34.6804		dsDNA -	IFNb	33.8078
dsDNA	IFNb	28.7655		dsDNA	IFNb	29.8749		dsDNA	IFNb	28.8262
Fig. S1 D
Sample	Target	Avg Ct		Sample	Target	Avg Ct		Sample	Target	Avg Ct
UN	ACTB	16.8998		UN	ACTB	17.0086		UN	ACTB	16.8199
Mock	ACTB	16.9544		Mock	ACTB	17.189		Mock	ACTB	16.8481
EV	ACTB	16.6384		EV	ACTB	16.7955		EV	ACTB	16.7384
EV + 0.04% DMSO	ACTB	16.7714		EV + 0.04% DMSO	ACTB	16.6945		EV + 0.04% DMSO	ACTB	16.7276
UN	CCL22	37.3082		UN	CCL22	37.1616		UN	CCL22	36.5954
Mock	CCL22	36.8758		Mock	CCL22	37.4967		Mock	CCL22	36.2967
EV	CCL22	26.7478		EV	CCL22	26.3361		EV	CCL22	26.0092
EV + 0.04% DMSO	CCL22	27.062		EV + 0.04% DMSO	CCL22	26.7747		EV + 0.04% DMSO	CCL22	26.3725

## Sheet: westerns
Fig. 2A					Fig. 2A
PRC E199					PRC E199
pSTING					b-tubulin
Fig. 2D					Fig. 2D
GK E73					GK E73
pSTING					b-tubulin
Fig. 2G					Fig. 2G
GK E122 (LK)					GK E122 (LK)
STING					b-tubulin
Fig. 4D					Fig. 4D
PRC E304 R2					PRC E304 R2
p65					b-tubulin
Fig. 5B					Fig. 5B
PRC E343 347					PRC E343 347
IRF3					b-tubulin
Fig. 6D					Fig. 6D
PRC E289-2, E296-2					PRC E289-2, E296-2
pSTING					b-tubulin
Fig. 6E					Fig. 6E
PRC E300 E294-R1					PRC E300 E294-R1
pSTING					b-tubulin
Fig. Supplementary 1A					Fig. Supplementary 1A
GK E103					GK E103
p-p65					p65
Fig. Supplementary 1B					Fig. Supplementary 1B
PRC E345					PRC E345
p-p65					p-p65
Fig. Supplementary 1C					Fig. Supplementary 1C
PRC E345					PRC E345
p-IRF3					IRF3
Fig. Supplementary 1E					Fig. Supplementary 1E					Fig. Supplementary 1E
E336_E338_E349_E345					E336_E338_E349_E345					E336_E338_E349_E345
p-IRF3					IRF3					b-tubulin
